# Supplementary material
Source: ML conference proceedings conference paper supplement (https://proceedings.neurips.cc/paper_files/paper/2009/hash/2afe4567e1bf64d32a5527244d104cea-Abstract.html)
Supplement: Supplementary file [file 2afe4567e1bf64d32a5527244d104cea-Supplemental.zip]

# Technical Proofs for “Nonlinear Learning using Local Coordinate Coding”

## 1 Notations and Main Results

**Definition 1.1 (Lipschitz Smoothness)** A function  $f(x)$  on  $\mathbb{R}^d$  is  $(\alpha, \beta, p)$ -Lipschitz smooth with respect to a norm  $\|\cdot\|$  if

$$|f(x') - f(x)| \leq \alpha \|x - x'\|,$$

and

$$|f(x') - f(x) - \nabla f(x)^\top (x' - x)| \leq \beta \|x - x'\|^{1+p},$$

where we assume  $\alpha, \beta > 0$  and  $p \in (0, 1]$ .

**Definition 1.2 (Coordinate Coding)** A coordinate coding is a pair  $(\gamma, C)$ , where  $C \subset \mathbb{R}^d$  is a set of anchor points, and  $\gamma$  is a map of  $x \in \mathbb{R}^d$  to  $[\gamma_v(x)]_{v \in C} \in \mathbb{R}^{|C|}$  such that  $\sum_v \gamma_v(x) = 1$ . It induces the following physical approximation of  $x$  in  $\mathbb{R}^d$ :

$$\gamma(x) = \sum_{v \in C} \gamma_v(x) v.$$

Moreover, for all  $x \in \mathbb{R}^d$ , we define the coding norm as

$$\|x\|_\gamma = \left( \sum_{v \in C} \gamma_v(x)^2 \right)^{1/2}.$$

**Proposition 1.1** The map  $x \rightarrow \sum_{v \in C} \gamma_v(x) v$  is invariant under any shift of the origin for representing data points in  $\mathbb{R}^d$  if and only if  $\sum_v \gamma_v(x) = 1$ .

**Lemma 1.1 (Linearization)** Let  $(\gamma, C)$  be an arbitrary coordinate coding on  $\mathbb{R}^d$ . Let  $f$  be an  $(\alpha, \beta, p)$ -Lipschitz smooth function. We have for all  $x \in \mathbb{R}^d$ :

$$\left| f(x) - \sum_{v \in C} \gamma_v(x) f(v) \right| \leq \alpha \|x - \gamma(x)\| + \beta \sum_{v \in C} |\gamma_v(x)| \|v - \gamma(x)\|^{1+p}.$$

**Definition 1.3 (Localization Measure)** Given  $\alpha, \beta, p$ , and coding  $(\gamma, C)$ , we define

$$Q_{\alpha, \beta, p}(\gamma, C) = \mathbb{E}_x \left[ \alpha \|x - \gamma(x)\| + \beta \sum_{v \in C} |\gamma_v(x)| \|v - \gamma(x)\|^{1+p} \right].$$

**Definition 1.4 (Manifold)** A subset  $\mathcal{M} \subset \mathbb{R}^d$  is called a  $p$ -smooth ( $p > 0$ ) manifold with intrinsic dimensionality  $m = m(\mathcal{M})$  if there exists a constant  $c_p(\mathcal{M})$  such that given any  $x \in \mathcal{M}$ , there exists  $m$  vectors  $v_1(x), \dots, v_m(x) \in \mathbb{R}^d$  so that  $\forall x' \in \mathcal{M}$ :

$$\inf_{\gamma \in \mathbb{R}^m} \left\| x' - x - \sum_{j=1}^m \gamma_j v_j(x) \right\| \leq c_p(\mathcal{M}) \|x' - x\|^{1+p}.$$

**Definition 1.5 (Covering Number)** Given any subset  $\mathcal{M} \subset \mathbb{R}^d$ , and  $\epsilon > 0$ . The covering number, denoted as  $\mathcal{N}(\epsilon, \mathcal{M})$ , is the smallest cardinality of an  $\epsilon$ -cover  $C \subset \mathcal{M}$ . That is,

$$\sup_{x \in \mathcal{M}} \inf_{v \in C} \|x - v\| \leq \epsilon.$$

**Theorem 1.1 (Manifold Coding)** If the data points  $x$  lie on a compact  $p$ -smooth manifold  $\mathcal{M}$ , and the norm is defined as  $\|x\| = (x^\top A x)^{1/2}$  for some positive definite matrix  $A$ . Then given any  $\epsilon > 0$ , there exist anchor points  $C \subset \mathcal{M}$  and coding  $\gamma$  such that

$$|C| \leq (1 + m(\mathcal{M}))\mathcal{N}(\epsilon, \mathcal{M}),$$

$$Q_{\alpha, \beta, p}(\gamma, C) \leq [\alpha c_p(\mathcal{M}) + (1 + \sqrt{m} + 2^{1+p}\sqrt{m})\beta] \epsilon^{1+p}.$$

Moreover, for all  $x \in \mathcal{M}$ , we have  $\|x\|_\gamma^2 \leq 1 + (1 + \sqrt{m})^2$ .

Given a local-coordinate coding scheme  $(\gamma, C)$ , we approximate each  $f(x) \in \mathcal{F}_{\alpha, \beta, p}^a$  by

$$f(x) \approx f_{\gamma, C}(\hat{w}, x) = \sum_{v \in C} \hat{w}_v \gamma_v(x),$$

where we estimate the coefficients using ridge regression as:

$$[\hat{w}_v] = \arg \min_{[w_v]} \left[ \sum_{i=1}^n \phi(f_{\gamma, C}(w, x_i), y_i) + \lambda \sum_{v \in C} (w_v - g(v))^2 \right], \quad (1)$$

**Theorem 1.2 (Generalization Bound)** Suppose  $\phi(p, y)$  is Lipschitz:  $|\phi'_1(p, y)| \leq B$ . Consider coordinate coding  $(\gamma, C)$ , and the estimation method (1) with random training examples  $S_n = \{(x_1, y_1), \dots, (x_n, y_n)\}$ . Then the expected generalization error satisfies the inequality:

$$\begin{aligned} & \mathbb{E}_{S_n} \mathbb{E}_{x, y} \phi(f_{\gamma, C}(\hat{w}, x), y) \\ & \leq \inf_{f \in \mathcal{F}_{\alpha, \beta, p}} \left[ \mathbb{E}_{x, y} \phi(f(x), y) + \lambda \sum_{v \in C} (f(v) - g(v))^2 \right] + \frac{B^2}{2\lambda n} \mathbb{E}_x \|x\|_\gamma^2 + B Q_{\alpha, \beta, p}(\gamma, C). \end{aligned}$$

**Theorem 1.3 (Consistency)** Suppose the data lie on a compact manifold  $\mathcal{M} \subset \mathbb{R}^d$ , and the norm  $\|\cdot\|$  is the Euclidean norm in  $\mathbb{R}^d$ . If loss function  $\phi(p, y)$  is Lipschitz. As  $n \rightarrow \infty$ , we choose  $\alpha, \beta \rightarrow \infty$ ,  $\alpha/n, \beta/n \rightarrow 0$  ( $\alpha, \beta$  depends on  $n$ ), and  $p = 0$ . Then it is possible to find coding  $(\gamma, C)$  using unlabeled data such that  $|C|/n \rightarrow 0$  and  $Q_{\alpha, \beta, p}(\gamma, C) \rightarrow 0$ . If we pick  $\lambda n \rightarrow \infty$ , and  $\lambda|C| \rightarrow 0$ . Then the local coordinate coding method (1) with  $g(v) \equiv 0$  is consistent as  $n \rightarrow \infty$ :

$$\lim_{n \rightarrow \infty} \mathbb{E}_{S_n} \mathbb{E}_{x, y} \phi(f(\hat{w}, x), y) = \inf_{f: \mathcal{M} \rightarrow \mathbb{R}} \mathbb{E}_{x, y} \phi(f(x), y).$$

## 2 Proofs

### 2.1 Proof of Proposition 1.1

Consider a change of the  $\mathbb{R}^d$  origin by  $u \in \mathbb{R}^d$ , which shifts any point  $x \in \mathbb{R}^d$  to  $x + u$ , and points  $v \in C$  to  $v + u$ . The shift-invariance requirement implies that after the change, we map  $x + u$  to  $\sum_{v \in C} \gamma_v(x) v + u$ , which should equal  $\sum_{v \in C} \gamma_v(x) (v + u)$ . This is equivalent to  $u = \sum_{v \in C} \gamma_v(x) u$ , which holds if and only if  $\sum_{v \in C} \gamma_v(x) = 1$ .

### 2.2 Proof of Lemma 1.1

For simplicity, let  $\gamma_v = \gamma_v(x)$  and  $x' = \gamma(x) = \sum_{v \in C} \gamma_v v$ . We have

$$\begin{aligned} |f(x) - \sum_{v \in C} \gamma_v f(v)| &\leq |f(x) - f(x')| + \left| \sum_{v \in C} \gamma_v (f(v) - f(x')) \right| \\ &= |f(x) - f(x')| + \left| \sum_{v \in C} \gamma_v (f(v) - f(x') - \nabla f(x')^\top (v - x')) \right| \\ &\leq |f(x) - f(x')| + \sum_{v \in C} |\gamma_v| |(f(v) - f(x') - \nabla f(x')^\top (v - x'))| \\ &\leq \alpha \|x - x'\|_2 + \beta \sum_{v \in C} |\gamma_v| \|x' - v\|^{1+p}. \end{aligned}$$

This implies the bound.

### 2.3 Proof of Theorem 1.1

Let  $m = m(\mathcal{M})$ . Given any  $\epsilon > 0$ , consider an  $\epsilon$ -cover  $C'$  of  $\mathcal{M}$  with  $|C'| \leq \mathcal{N}(\epsilon, \mathcal{M})$ . Given each  $u \in C'$ , define  $C_u = \{v_1(u), \dots, v_d(u)\}$ , where  $v_j(u)$  are defined in Definition 1.4. Define the anchor points as

$$C = \cup_{u \in C'} \{u + v_j(u) : j = 1, \dots, m\} \cup C'.$$

It follows that  $|C| \leq (1 + m)\mathcal{N}(\epsilon, \mathcal{M})$ .

In the following, we only need to prove the existence of a coding  $\gamma$  on  $\mathcal{M}$  that satisfies the requirement of the theorem. Without loss of generality, we assume that  $\|v_j(u)\| = \epsilon$  for each  $u$  and  $j$ , and given  $u$ ,  $\{v_j(u) : j = 1, \dots, m\}$  are orthogonal with respect to  $A$ :  $v_j^\top(u) A v_k(u) = 0$  when  $j \neq k$ .

For each  $x \in \mathcal{M}$ , let  $u_x \in C'$  be the closest point to  $x$  in  $C'$ . We have  $\|x - u_x\| \leq \epsilon$  by the definition of  $C'$ . Now, Definition 1.4 implies that there exists  $\gamma'_j(x)$  ( $j = 1, \dots, m$ ) such that

$$\left\| x - u_x - \sum_{j=1}^m \gamma'_j(x) v_j(u_x) \right\| \leq c_p(\mathcal{M}) \epsilon^{1+p}.$$

The optimal choice is the  $A$ -projection of  $x - u_x$  to the subspace spanned by  $\{v_j(u_x) : j = 1, \dots, m\}$ . The orthogonality condition thus implies that

$$\sum_{j=1}^m \gamma'_j(x)^2 \|v_j(u_x)\|^2 \leq \|x - u_x\|^2 \leq \epsilon^2.$$

Therefore

$$\sum_{j=1}^m \gamma_j'(x)^2 \leq 1,$$

which implies that for all  $x$ :

$$\sum_{j=1}^m |\gamma_j'(x)| \leq \sqrt{m}.$$

We can now define the coordinate coding of  $x \in \mathcal{M}$  as

$$\gamma_v(x) = \begin{cases} \gamma_j' & v = u_x + v_j(u_x) \\ 1 - \sum_{j=1}^m \gamma_j' & v = u_x \\ 0 & \text{otherwise} \end{cases}.$$

This implies the following bounds:

$$\|x - \gamma(x)\| \leq c_p(\mathcal{M})\epsilon^{1+p}$$

and

$$\sum_{v \in C} |1 - \sum_j \gamma_j'| \|v - \gamma(x)\|^{1+p} = |\gamma_{u_x}(x)| \|\gamma(x) - u_x\| + \sum_{j=1}^m |\gamma_j'(x)| \|(v - u_x) - (\gamma(x) - u_x)\|^{1+p} \quad (2)$$

$$\leq (1 + \sqrt{m})\epsilon^{1+p} \sum_{j=1}^m |\gamma_j'(x)| (\epsilon + \epsilon)^{1+p} \quad (3)$$

$$= [1 + \sqrt{m} + 2^{1+p}\sqrt{m}]\epsilon^{1+p}. \quad (4)$$

where we have used  $\|v - u_x\| = \epsilon$ , and  $\|\gamma(x) - u_x\| \leq \|x - u_x\| \leq \epsilon$ .

## 2.4 Proof of Theorem 1.2

Consider  $n + 1$  samples  $S_{n+1} = \{(x_1, y_1), \dots, (x_{n+1}, y_{n+1})\}$ . We shall introduce the following notation:

$$[\tilde{w}_v] = \arg \min_{[w_v]} \left[ \frac{1}{n} \sum_{i=1}^{n+1} \phi(f_{\gamma, C}(w, x_i), y_i) + \lambda \sum_{v \in C} w_v^2 \right]. \quad (5)$$

Let  $k$  be an integer randomly drawn from  $\{1, \dots, n + 1\}$ . Let  $[\hat{w}_v^{(k)}]$  be the solution of

$$[\hat{w}_v^{(k)}] = \arg \min_{[w_v]} \left[ \frac{1}{n} \sum_{i=1, \dots, n+1; i \neq k} \phi(f_{\gamma, C}(w, x_i), y_i) + \lambda \sum_{v \in C} w_v^2 \right],$$

with the  $k$ -th example left-out.

We have the following stability lemma from [?], which can be stated as follows using our terminology:

**Lemma 2.1** *The following inequality holds*

$$|f_{\gamma,C}(\hat{w}^{(k)}, x_k) - f_{\gamma,C}(\tilde{w}, x_k)| \leq \frac{\|x_k\|_\gamma^2}{2\lambda n} |\phi'_1(f_{\gamma,C}(\tilde{w}, x_k), y_k)|.$$

By using Lemma 2.1, we obtain for all  $\alpha > 0$ :

$$\begin{aligned} & \phi(f_{\gamma,C}(\tilde{w}, x_k), y_k) - \phi(f_{\gamma,C}(\hat{w}^{(k)}, x_k), y_k) \\ &= \phi(f_{\gamma,C}(\tilde{w}, x_k), y_k) - \phi(f_{\gamma,C}(\hat{w}^{(k)}, x_k), y_k) - \phi'_1(f_{\gamma,C}(\hat{w}^{(k)}, x_k), y_k)(f_{\gamma,C}(\tilde{w}, x_k) - f_{\gamma,C}(\hat{w}^{(k)}, x_k)) \\ & \quad + \phi'_1(f_{\gamma,C}(\hat{w}^{(k)}, x_k), y_k)(f_{\gamma,C}(\tilde{w}, x_k) - f_{\gamma,C}(\hat{w}^{(k)}, x_k)) \\ & \geq \phi'_1(f_{\gamma,C}(\hat{w}^{(k)}, x_k), y_k)(f_{\gamma,C}(\tilde{w}, x_k) - f_{\gamma,C}(\hat{w}^{(k)}, x_k)) \\ & \geq -\phi'_1(f_{\gamma,C}(\hat{w}^{(k)}, x_k), y_k)^2 \|x_k\|_\gamma^2 / (2\lambda n) \\ & \geq -B^2 \|x_k\|_\gamma^2 / (2\lambda n). \end{aligned}$$

In the above derivation, the first inequality uses the convexity of  $\phi(f, y)$  with respect to  $f$ , which implies that  $\phi(f_1, y) - \phi(f_2, y) - \phi'_1(f_2, y)(f_1 - f_2) \geq 0$ . The second inequality uses Lemma 2.1, and the third inequality uses the assumption of the loss function.

Now by summing over  $k$ , and consider any fixed  $f \in \mathcal{F}_{\alpha,\beta,p}$ , we obtain:

$$\begin{aligned} & \sum_{k=1}^{n+1} \phi(f_{\gamma,C}(\hat{w}^{(k)}, x_k), y_k) \\ & \leq \sum_{k=1}^{n+1} \left[ \phi(f_{\gamma,C}(\tilde{w}, x_k), y_k) + \frac{B}{2\lambda n} \|x_k\|_\gamma^2 \right] \\ & \leq n \left[ \frac{1}{n} \sum_{k=1}^{n+1} \phi \left( \sum_{v \in C} \gamma_v(x_k) f(v), y_k \right) + \lambda \sum_{v \in C} f(v)^2 \right] + \frac{B^2}{2\lambda n} \sum_{k=1}^{n+1} \|x_k\|_\gamma^2 \\ & \leq n \left[ \frac{1}{n} \sum_{k=1}^{n+1} [\phi(f(x_k), y_k) + BQ(x_k)] + \lambda \sum_{v \in C} f(v)^2 \right] + \frac{B^2}{2\lambda n} \sum_{k=1}^{n+1} \|x_k\|_\gamma^2, \end{aligned}$$

where  $Q(x) = \alpha \|x - \gamma(x)\| + \beta \sum_{v \in C} |\gamma_v(x)| \|v - \gamma(x)\|^{1+p}$ . In the above derivation, the second inequality follows from the definition of  $\tilde{w}$  as the minimizer of (5). The third inequality follows from Lemma 1.1. Now by taking expectation with respect to  $S_{n+1}$ , we obtain

$$\begin{aligned} & (n+1) \mathbb{E}_{S_{n+1}} \phi(f_{\gamma,C}(\hat{w}^{(n+1)}, x_{n+1}), y_{n+1}) \\ & \leq n \left[ \frac{n+1}{n} \mathbb{E}_{x,y} \phi(f(x), y) + \frac{n+1}{n} BQ_{\alpha,\beta,p}(\gamma, C) + \lambda \sum_{v \in C} f(v)^2 \right] + \frac{B^2(n+1)}{2\lambda n} \mathbb{E}_x \|x\|_\gamma^2. \end{aligned}$$

This implies the desired bound.

## 2.5 Proof of Theorem 1.3

Note that any measurable function  $f : \mathcal{M} \rightarrow \mathcal{R}$  can be approximated by  $\mathcal{F}_{\alpha,\beta,p}$  with  $\alpha, \beta \rightarrow \infty$  and  $p = 0$ . Therefore we only need to show

$$\lim_{n \rightarrow \infty} \mathbb{E}_{S_n} \mathbb{E}_{x,y} \phi(f_{\gamma,C}(\hat{w}, x), y) = \lim_{n \rightarrow \infty} \inf_{f \in \mathcal{F}_{\alpha,\beta,p}} \mathbb{E}_{x,y} \phi(f(x), y).$$

Theorem 1.1 implies that it is possible to pick  $(\gamma, C)$  such that  $|C|/n \rightarrow 0$  and  $Q_{\alpha, \beta, p}(\gamma, C) \rightarrow 0$ . Moreover,  $\|x\|_\gamma$  is bounded.

Given any  $f \in \mathcal{F}_{\alpha, \beta, 0}$  and any  $n$  independent fixed  $A > 0$ ; if we let  $f_A(x) = \max(\min(f(x), A), -A)$ , then it is clear that  $f_A(x) \in \mathcal{F}_{\alpha, \alpha + \beta, 0}$ . Therefore Theorem 1.2 implies that as  $n \rightarrow \infty$ ,

$$\mathbb{E}_{S_n} \mathbb{E}_{x, y} \phi(f_{\gamma, C}(\hat{w}, x), y) \leq \mathbb{E}_{x, y} \phi(f_A(x), y) + o(1).$$

Since  $A$  is arbitrary, we let  $A \rightarrow \infty$  to obtain the desired result.

## References
